# Supplementary material
Source: PubMed Central journal article supplement (PMC6439730)
Supplement: jamaneurol-76-274-s001.pdf [file jamaneurol-76-274-s001.pdf]

## Supplementary Online Content

Naegelin Y, Naegelin P, von Felten S, et al. Association of rituximab treatment with disability progression among patients with secondary progressive multiple sclerosis. *JAMA Neurol*. Published online January 7, 2019. doi:10.1001/jamaneurol.2018.4239

**eTable 1.** Standardized Differences

**eTable 2.** Treatment

**eFigure 1.** Density Plot of Propensity Scores

**eFigure 2.** Standardized Differences Between Groups

This supplementary material has been provided by the authors to give readers additional information about their work.

**eTable 1. Standardized Differences**

| <b>Before Matching</b>  |                  |                       |                      |
|-------------------------|------------------|-----------------------|----------------------|
| <b>Variable</b>         | <b>Std. Diff</b> | <b>Std. Diff. Low</b> | <b>Std. Diff. Up</b> |
| <b>Age</b>              | 0.51             | 0.13                  | 0.88                 |
| <b>EDSS</b>             | 0.58             | 0.20                  | 0.95                 |
| <b>Disease Duration</b> | 0.01             | -0.35                 | 0.38                 |
| <b>Follow-up time</b>   | 0.72             | 0.34                  | 1.10                 |
| <b>Gender</b>           | 0.07             | -0.30                 | 0.44                 |
| <b>After Matching</b>   |                  |                       |                      |
| <b>Variable</b>         | <b>Std. Diff</b> | <b>Std. Diff. Low</b> | <b>Std. Diff. Up</b> |
| <b>Age</b>              | 0.19             | -0.23                 | 0.60                 |
| <b>EDSS</b>             | 0.17             | -0.25                 | 0.59                 |
| <b>Disease Duration</b> | 0.13             | -0.29                 | 0.55                 |
| <b>Follow-up time</b>   | 0.54             | 0.11                  | 0.96                 |
| <b>Gender</b>           | 0.05             | -0.37                 | 0.46                 |

eTable 1: Standardized differences for baseline variables (used for matching) and follow-up time (in addition) before and after matching

eTable 2. Treatment

| Cohort                | Pre-BL (1 year before BL)       |           |           | BL and Follow-up          |           |          |                    |           |
|-----------------------|---------------------------------|-----------|-----------|---------------------------|-----------|----------|--------------------|-----------|
| Rituximab matched     | <b>Medication</b>               | <b>n=</b> | <b>%</b>  | <b>Medication BL n=44</b> |           |          |                    |           |
|                       | None                            | 18        | 40.9      | Rituximab                 |           |          |                    |           |
|                       | INF-β 1a i.m.                   | 2         | 4.5       |                           |           |          |                    |           |
|                       | INF-β 1b                        | 4         | 9.1       |                           |           |          |                    |           |
|                       | GA                              | 4         | 9.1       |                           |           |          |                    |           |
|                       | Fingolimod                      | 2         | 4.5       |                           |           |          |                    |           |
|                       | Methotrexat                     | 0         | 0         |                           |           |          |                    |           |
|                       | Mitoxantrone                    | 6         | 13.7      |                           |           |          |                    |           |
|                       | Mycophenolat-Mophetil           | 1         | 2.3       |                           |           |          |                    |           |
|                       | Natalizumab                     | 4         | 9.1       |                           |           |          |                    |           |
|                       | INF-β 1a s.c.                   | 2         | 4.5       |                           |           |          |                    |           |
|                       | Rituximab                       | 0         | 0         |                           |           |          |                    |           |
|                       | Teriflunomide                   | 1         | 2.3       |                           |           |          |                    |           |
| Rituximab all         | <b>Medication</b>               | <b>n=</b> | <b>%</b>  | <b>Medication BL n=54</b> |           |          |                    |           |
|                       | None                            | 21        | 38.9      | Rituximab                 |           |          |                    |           |
|                       | INF-β 1a i.m.                   | 2         | 3.7       |                           |           |          |                    |           |
|                       | INF-β 1b                        | 4         | 7.4       |                           |           |          |                    |           |
|                       | GA                              | 6         | 11.1      |                           |           |          |                    |           |
|                       | Fingolimod                      | 4         | 7.4       |                           |           |          |                    |           |
|                       | Methotrexat                     | 1         | 1.9       |                           |           |          |                    |           |
|                       | Mitoxantrone                    | 6         | 11.1      |                           |           |          |                    |           |
|                       | Mycophenolat-Mophetil           | 1         | 1.9       |                           |           |          |                    |           |
|                       | Natalizumab                     | 5         | 9.2       |                           |           |          |                    |           |
|                       | INF-β 1a s.c.                   | 3         | 5.5       |                           |           |          |                    |           |
|                       | Rituximab                       | 0         | 0         |                           |           |          |                    |           |
|                       | Teriflunomide                   | 1         | 1.9       |                           |           |          |                    |           |
| Control Group matched | <b>Medication</b>               | <b>n=</b> | <b>%</b>  | <b>Medication</b>         | <b>n=</b> | <b>%</b> | <b>Switched to</b> | <b>n=</b> |
|                       | None                            | 21        | 47.7      | None                      | 23        | 52.3     |                    |           |
|                       | INF-β 1a i.m.                   | 0         | 0         | INF-β 1a i.m.             | 0         | 0        | None               |           |
|                       | INF-β 1b                        | 13        | 29.6      | INF-β 1b                  | 12        | 27.3     | None               | 2         |
|                       | GA                              | 1         | 2.3       | GA                        | 2         | 4.5      |                    |           |
|                       | Methylprednisolone monthly i.v. | 0         | 0         | MP m IV                   | 1         | 2.3      |                    |           |
|                       | Mitoxantrone                    | 6         | 13.6      | Mitoxantrone              | 3         | 6.8      | None/GA            | 1/1       |
|                       | INF-β 1a s.c.                   | 3         | 6.8       | INF-β 1a s.c.             | 3         | 6.8      | None/Mitox         | 2/1       |
| Rituximab             | 0                               | 0         | Rituximab | 0                         | 0         |          |                    |           |
| Control Group all     | <b>Medication</b>               | <b>n=</b> | <b>%</b>  | <b>Medication</b>         | <b>n=</b> | <b>%</b> | <b>Switched to</b> | <b>n=</b> |
|                       | None                            | 29        | 49.1      | None                      | 32        | 54.2     | INF-β 1b /Mitox    | 1/1       |
|                       | INF-β 1a i.m.                   | 2         | 3.4       | INF-β 1a i.m.             | 1         | 1.7      | None               | 1         |
|                       | INF-β 1b                        | 17        | 28.8      | INF-β 1b                  | 16        | 27.1     | None/Mitox         | 3/1       |
|                       | GA                              | 1         | 1.7       | GA                        | 1         | 1.7      |                    |           |
|                       | Methylprednisolone monthly i.v. | 0         | 0         | MP m IV                   | 1         | 1.7      |                    |           |
|                       | Mitoxantrone                    | 6         | 10.2      | Mitoxantrone              | 4         | 6.8      | None/GA            | 1/2       |
|                       | INF-β 1a s.c.                   | 4         | 6.8       | INF-β 1a s.c.             | 4         | 6.8      | None/Mitox         | 3/1       |
| Rituximab             | 0                               | 0         | Rituximab | 0                         | 0         |          |                    |           |

eTable 2: Treatment before BL and during follow-up for both cohorts (full and matched cohorts). "Switched to" indicates patients that switched during follow-up to another treatment. GA=Glatirameracetate

**eFigure 1. Density Plot of Propensity Scores**

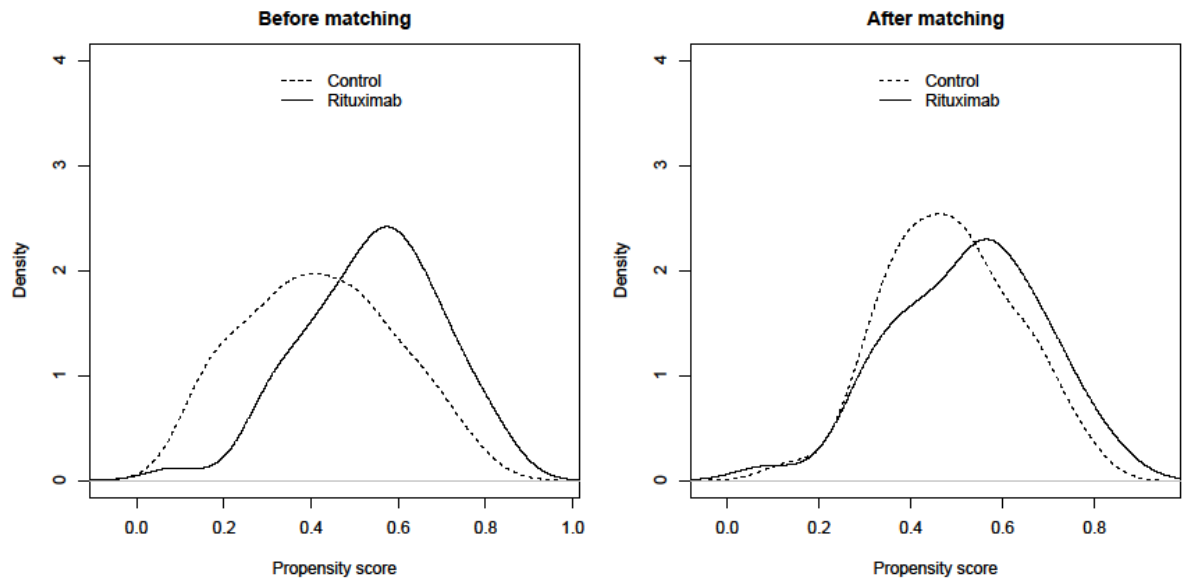

eFigure 1: Density plot of the distribution of propensity scores in the rituximab and control group before matching (left) and after matching (right).

eFigure 2. Standardized Differences Between Groups

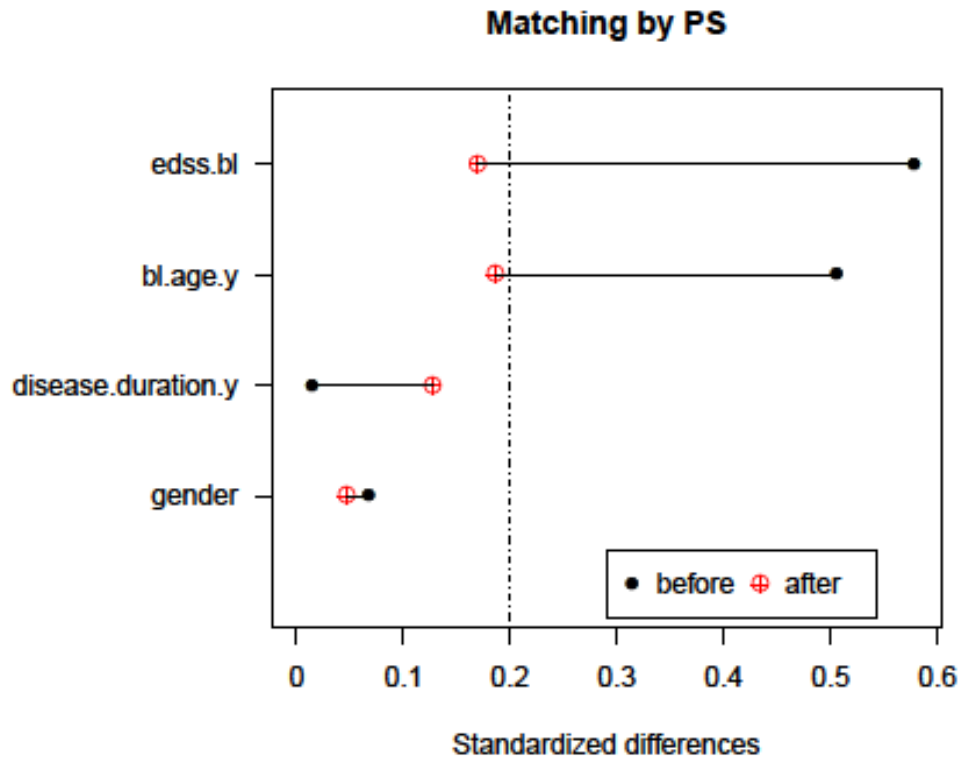

eFigure 2: Illustration of the standardized differences between groups in the total cohort and after propensity score (PS) matching (matched cohort).
